# Supplementary material for: Alcohol consumption and cause-specific mortality in Cuba: prospective study of 120 623 adults
Source: PubMed Central journal article supplement (PMC7980059; doi:10.1016/j.eclinm.2020.100692), 2021-03-17

# Alcohol consumption and cause-specific mortality in Cuba: prospective study of 120 623 adults

## Supplementary Appendix, Table of Contents

|                                                                                                                                                                                                  | Page |
|--------------------------------------------------------------------------------------------------------------------------------------------------------------------------------------------------|------|
| <b>Questionnaire</b> (Spanish)                                                                                                                                                                   | 2    |
| <b>Questionnaire</b> (English translation)                                                                                                                                                       | 3    |
| <b>Table S1.</b> Mortality endpoints and ICD codes                                                                                                                                               | 4    |
| <b>Table S2.</b> Number of participants excluded from mortality analyses, by sex                                                                                                                 | 5    |
| <b>Table S3.</b> Frequency of alcohol consumption among regular drinkers included in the main analyses, by sex and type of alcohol consumed                                                      | 6    |
| <b>Table S4.</b> Alcohol consumption at baseline and resurvey (mean 8.6 years after recruitment), among 20 593 participants                                                                      | 7    |
| <b>Table S5.</b> Alcohol consumption versus all-cause mortality at ages 35-79 years in Cuba, among regular (ie, at least weekly) drinkers, with progressive adjustment for potential confounders | 8    |
| <b>Figure S1.</b> Alcohol consumption versus all-cause mortality at ages 35-79 years in Cuba, during follow-up years <5, 5-<10, 10-<15, and 15 onwards                                           | 9    |
| <b>Figure S2.</b> Alcohol consumption versus all-cause mortality in Cuba, by age, by sex, and by smoking                                                                                         | 10   |
| <b>Table S6.</b> Observed and expected numbers of deaths from specific causes at ages 35-79 years in Cuba, by weekly alcohol consumption                                                         | 11   |
| <b>Figure S3.</b> Alcohol consumption versus all-cause, vascular, cancer and other mortality at ages 35-79 years in Cuba, with additional adjustment for other potential confounders             | 12   |
| <b>Figure S4.</b> Alcohol consumption versus all-cause, vascular, cancer and other mortality at ages 35-79 years in Cuba, excluding first two years of follow-up                                 | 13   |
| <b>Figure S5.</b> Alcohol consumption versus all-cause, vascular, cancer and other mortality at ages 35-79 years in Cuba, excluding participants taking anti-hypertensives                       | 14   |

**ESTUDIO CUBANO SOBRE TABACO Y SALUD**

Provincia No.  1-9 Municipio No.  0-99 Area de  0-9 Salud No.

**17524 A**

Carnet de -  
 Identidad No. Fecha de nacimiento (a.m.d) + 5 números  
 (11 números: excluir si no tiene C.I. de 6 + 5 números)

Nombre de la persona y dirección:   
 Calle No. Teléfono

Nombre del familiar y dirección:   
 Calle No. Municipio Provincia Teléfono

**LETRA DE MOLDE,  
 POR FAVOR**

Sexo (1 = masc, 2 = fem.)  1-2  
 Color de piel (1 = blanco, 2 = negro, 3 = mestizo, 4 = otra)  1-4  
 Estado social (1 = soltero/viudo, 2 = casado)  1-2  
 Educación completada (0 = ninguno\*, 1 = primaria, 2 = secundaria, 3 = técnico medio, 4 = obrero calificado, 5 = pre-universitario, 6 = universitario)  0-6  
 Categoría ocupacional (0 = ninguno\*, 1 = dirigente, 2 = profesional, 3 = técnico, 4 = de servicio, 5 = agrícola, 6 = industria, 7 = militar)  0-7  
 \* Si es cero (Ej. ama de casa, jubilado o desempleado), diga si ha trabajado alguna vez.  0-7

Quisiera medir su presión arterial mientras esta sentado, hacerle unas pocas preguntas sobre tabaco y alcohol, y medir su PA de nuevo.  
 Presión arterial (una sola toma, sentado):  /  PAS / PAD

Ahora, TABACO: ¿Ha fumado alguna vez regularmente (Ej. en la mayoría de los días)?  S=Sí, N=No  
 SI NO, vaya directamente a las preguntas sobre ALCOHOL.

¿A QUE EDAD APROXIMADAMENTE COMENZO USTED A FUMAR REGULARMENTE?  años de edad  
 ¿Desde entonces ha dejado de fumar alguna vez por un año o más?  S=Sí, N=No  
 ¿Aproximadamente cuántos cigarrillos por día se fumó usted el último mes? (0 = ninguno)  diariamente  
 ¿Aproximadamente cuántos tabacos por día se fumó usted el último mes? (0 = ninguno)  diariamente  
 ¿Si no fumó el último mes, a que edad dejó usted de fumar? (en blanco si no es aplicable)  años de edad

Ahora me gustaría hacerle algunas preguntas sobre ALCOHOL:

¿Aproximadamente cuántos días a la semana toma usted ron u otra bebida fuerte?  0-7  
 (0 = cero días o usualmente menos de una vez por semana)  
 ¿El día que usted toma ron (u otra bebida fuerte) cuántas líneas se toma?  líneas  
 ¿Aproximadamente cuántos días a la semana toma usted cerveza?  0-7  
 (0 = cero días o usualmente menos de una vez por semana)  
 ¿El día que usted toma cerveza, cuántas botellas se toma (aprox.)  botellas

Finalmente, algunos aspectos médicos: Quisiera preguntarle sobre algunas enfermedades. Lo que quiero conocer es si usted alguna vez ha sido tratado por alguna de estas enfermedades. Si no lo ha sido, conteste No (N).

|                     |                              |                              |                              |                    |                              |
|---------------------|------------------------------|------------------------------|------------------------------|--------------------|------------------------------|
| Asma                | <input type="checkbox"/> S/N | A.V.E. (definitivo/probable) | <input type="checkbox"/> S/N | Cirrosis           | <input type="checkbox"/> S/N |
| Enfisema (E.P.O.C.) | <input type="checkbox"/> S/N | Infarto miocardio            | <input type="checkbox"/> S/N | Enf. renal crónica | <input type="checkbox"/> S/N |
| Diabetes            | <input type="checkbox"/> S/N | Angina pectoris              | <input type="checkbox"/> S/N | Cáncer de piel     | <input type="checkbox"/> S/N |
| Úlcera péptica      | <input type="checkbox"/> S/N | Hipertensión arterial        | <input type="checkbox"/> S/N | Otro cáncer*       | <input type="checkbox"/> S/N |

\*Si Otro Cáncer = Sí, dónde le comenzó el cáncer?  0-9

(1 = boca o faringe, 2 = laringe, 3 = pulmón, 4 = esófago, 5 = estómago, 6 = páncreas, 7 = cuello útero, 8 = vejiga, 9 = mama, 0 = otro, más de un sitio, o no conocido)

¿Esta usted tomando alguna medicina regularmente desde hace más de un mes? Si es Sí: ¿Qué medicinas esta tomando? (Marque con X)

|           |                          |          |                          |                |                          |              |                          |              |                          |
|-----------|--------------------------|----------|--------------------------|----------------|--------------------------|--------------|--------------------------|--------------|--------------------------|
| Digoxina  | <input type="checkbox"/> | Nitratos | <input type="checkbox"/> | Hipoglic. oral | <input type="checkbox"/> | Anticoncept. | <input type="checkbox"/> | Ca. Antag.   | <input type="checkbox"/> |
| Beta B.   | <input type="checkbox"/> | Inh. ACE | <input type="checkbox"/> | Insulina       | <input type="checkbox"/> | Antidepres.  | <input type="checkbox"/> | Broncodilat. | <input type="checkbox"/> |
| Diurético | <input type="checkbox"/> | ASA      | <input type="checkbox"/> | Esteroides     | <input type="checkbox"/> | Ansiolítico  | <input type="checkbox"/> | Antiácido/H2 | <input type="checkbox"/> |

MUCHAS GRACIAS POR SUS RESPUESTAS: Ahora necesito tomarle

de nuevo su presión arterial. Repita la toma de PA (una sola toma sentado):  /  PAS/PAD

¿Cuál es la última cifra PA que tiene en su historia clínica antes de hoy?

Fecha de la última PA (a.m.d)  &  /  PAS/PAD

¿Cuál es su TALLA aproximada? (medirlo o preguntarlo)  cm

¿Cuál es su PESO aproximado? (pesarlo o preguntarlo)  kg

Fecha de la entrevista  (a.m.d)

Calidad de la cooperación (1 = pobre, 2 = regular, 3 = buena)  1-3

Nombre y apellidos del entrevistador:

¿Algún comentario?

# CUBAN STUDY OF TOBACCO AND HEALTH: PROSPECTIVE

Province N<sup>o</sup>  1-9 Municipality N<sup>o</sup>   0-99 Health Area N<sup>o</sup>  0-9 Identity Card N<sup>o</sup>         Date of birth (y,m,d)

Name of interviewee:

Address:   
Street N<sup>o</sup> Municipality Province Telephone

Name of friend:

Address:   
Street N<sup>o</sup> Municipality Province Telephone

**CAPITAL LETTERS,  
PLEASE!**

Sex (1=masc, 2=fem)  1-2  
 Skin colour (1=white, 2=black, 3=mixed, 4=other)  1-4  
 Marital status (1=single/widowed, 2=married)  1-2  
 Education completed (0=none, 1=primary, 2=secondary, 3=technician, 4=skilled worker, 5=high school, 6=university)  0-6  
 Occupational category (0=none, 1=manager, 2=professional, 3=technician, 4=service worker, 5=agricultural, 6=industrial, 7=military; if housewife, retired or unemployed, we would like to know if you were employed in the past)  0-7  
 (0-7)

What I'd like to do is measure your blood pressure while you are sitting down, ask you a few questions about tobacco and alcohol, and then do your blood pressure again. Blood pressure (single measurement, seated):   /   SBP / DBP

Now, TOBACCO: Have you EVER smoked regularly (i.e. on most days for at least a year)?  Y=Yes, N=No  
 If NO, then go directly to the ALCOHOL questions

AT ABOUT WHAT AGE DID YOU FIRST START SMOKING TOBACCO REGULARLY?   years of age  
 Since then, have you ever STOPPED smoking for a year or more?  Y=Yes, N=No  
 About how many cigarettes a day did you smoke last month? (0=none)   daily  
 About how many cigars a day did you smoke last month? (0=none)   daily  
 If NO SMOKING last month, at about what age did you last stop smoking? (blank = not applicable)   years of age

**Now I'd like to ask you some questions about ALCOHOL:**

About how many days a week would you drink any rum or other spirits? (0=none or usually less than once a week)  0-7  
 On a day when you drink rum (or other spirits), about how many glasses ("lineas") would you drink?   lineas  
 About how many days a week would you drink beer? (0=none or usually less than once a week)  0-7  
 On a day when you do drink beer, about how many bottles would you drink?   bottles

**Finally, MEDICAL MATTERS: I'd like to ask about various different illnesses. What I want to know for each illness is whether you've ever had medical attention for it. If you've never heard of the illness, then just say NO.**

|                    |                          |                            |                          |                        |                          |
|--------------------|--------------------------|----------------------------|--------------------------|------------------------|--------------------------|
| Asthma             | <input type="text"/> Y/N | Stroke (definite/probable) | <input type="text"/> Y/N | Cirrhosis of the liver | <input type="text"/> Y/N |
| Emphysema/C.O.P.D. | <input type="text"/> Y/N | Myocardial infarction *    | <input type="text"/> Y/N | Chronic kidney disease | <input type="text"/> Y/N |
| Diabetes           | <input type="text"/> Y/N | Angina pectoris *          | <input type="text"/> Y/N | Skin cancer            | <input type="text"/> Y/N |
| Peptic ulcer       | <input type="text"/> Y/N | Hypertension               | <input type="text"/> Y/N | Other cancer*          | <input type="text"/> Y/N |

\*If Other cancer, where in your body did the cancer start?  0-9  
(1=mouth, 2=larynx, 3=lung, 4=oesophagus, 5=stomach, 6=pancreas, 7=cervix, 8=bladder, 9=breast, 0=other, more than 1 site, or not known)

**Have you been taking any regular medication for more than 1 month? If Yes: What such medicines are you now taking? (Mark with an X)**

|              |                      |               |                      |                    |                      |                 |                      |                |                      |
|--------------|----------------------|---------------|----------------------|--------------------|----------------------|-----------------|----------------------|----------------|----------------------|
| Digoxin      | <input type="text"/> | Nitrates      | <input type="text"/> | Oral hypoglycaemic | <input type="text"/> | O.Contraceptive | <input type="text"/> | Ca. antagonist | <input type="text"/> |
| Beta blocker | <input type="text"/> | ACE inhibitor | <input type="text"/> | Insulin            | <input type="text"/> | Antidepressant  | <input type="text"/> | Bronchodilator | <input type="text"/> |
| Diuretic     | <input type="text"/> | Aspirin       | <input type="text"/> | Steroids           | <input type="text"/> | Tranquillisers  | <input type="text"/> | Antacid/H2     | <input type="text"/> |

**THANK YOU VERY MUCH FOR YOUR ANSWERS. Now we just need one more blood pressure. Repeat blood pressure (single measurement, seated)**   /   PAS / PAD

What was the last blood pressure in the patient's medical record before today?

Date of last BP (y,m,d)    &   /   PAS / PAD

Please check that ALL the questions have been answered, so that there is no need to write back to you for extra details.  
**MANY THANKS!**

What is your approximate HEIGHT (either ask or measure)?    cm

What is your approximate WEIGHT (either ask or measure)?    kg

Date of interview    (y,m,d)

Quality of co-operation (1=poor, 2=fair, 3=good)  1-3

Name of interviewer: please PRINT

**Table S1: Mortality endpoints and ICD codes**

| <b>Endpoint name</b>        | <b>ICD-9 codes</b>                                                                   | <b>ICD-10 codes</b>                                                                         |
|-----------------------------|--------------------------------------------------------------------------------------|---------------------------------------------------------------------------------------------|
| <b>Vascular</b>             | 390-459, 798                                                                         | I00-I99, R96                                                                                |
| Ischaemic heart disease     | 410-414                                                                              | I20-I25                                                                                     |
| Stroke                      | 430-431, 433-434, 436                                                                | I60-I61, I63-I64                                                                            |
| Other                       | 390-409, 415-429, 432, 435, 437-459, 798                                             | I00-I19, I26-I59, I62, I65-I99, R96                                                         |
| <b>Neoplastic</b>           | 140-208                                                                              | C00-C97                                                                                     |
| Lung cancer                 | 162                                                                                  | C33-C34                                                                                     |
| Upper aero-digestive cancer | 140-150, 161                                                                         | C00-C15, C32                                                                                |
| Other                       | 151-160, 163-208                                                                     | C16-C31, C35-C97                                                                            |
| <b>Other medical</b>        | 000-1002 excl (390-459, 798, 140-208, 800-1002, 780-797, 799)                        | A00-Y89 excl (I00-I99, R96, C00-C97, S00-Y89, R00-R95, R98-R99)                             |
| Respiratory                 | 460-519, 010-012                                                                     | J00-J98, A15-A16                                                                            |
| Liver cirrhosis             | 571                                                                                  | K70, K74                                                                                    |
| Other                       | 000-1002 excl (390-459, 798, 140-208, 460-519, 010-012, 571, 800-1002, 780-797, 799) | A00-Y89 excl (I00-I99, R96, C00-C97, J00-J98, A15-A16, K70, H74, S00-Y89, R00-R95, R98-R99) |
| <b>External</b>             | 800-1002                                                                             | S00-Y89                                                                                     |
| <b>Ill-defined</b>          | 780-797, 799                                                                         | R00-R95, R98-R99                                                                            |
| <b>All causes</b>           | 000-1002                                                                             | A00-Y89                                                                                     |

**Table S2: Number of participants excluded from mortality analyses, by sex**

|                                                        | Men                   | Women                 | All                    |
|--------------------------------------------------------|-----------------------|-----------------------|------------------------|
| <b>Number of participants recruited</b>                | 64 743 (100%)         | 81 813 (100%)         | 146 556 (100%)         |
| <b>Reasons for exclusion (not mutually exclusive):</b> |                       |                       |                        |
| <b>Prior disease*</b>                                  | 9061 (14.0%)          | 10 850 (13.3%)        | 19 911 (13.6%)         |
| <b>Alcohol variables</b>                               |                       |                       |                        |
| Missing values                                         | 152 (0.2%)            | 20 (0.02%)            | 172 (0.1%)             |
| Incomplete information                                 | 211 (0.3%)            | 92 (0.1%)             | 303 (0.2%)             |
| <b>Missing values in covariates</b>                    |                       |                       |                        |
| Age                                                    | 0 (0%)                | 0 (0%)                | 0 (0.0%)               |
| Sex                                                    | 0 (0%)                | 0 (0%)                | 0 (0.0%)               |
| Province                                               | 0 (0%)                | 0 (0%)                | 0 (0.0%)               |
| Level of education                                     | 61 (0.1%)             | 103 (0.1%)            | 164 (0.1%)             |
| Smoking                                                | 0 (0%)                | 0 (0%)                | 0 (0.0%)               |
| <b>No follow-up at ages 35-79 years</b>                |                       |                       |                        |
| Age 80 years or over at baseline                       | 3333 (5.1%)           | 4156 (5.1%)           | 7489 (5.1%)            |
| <b>Total participants excluded</b>                     | <b>11 814 (18.2%)</b> | <b>14 119 (17.3%)</b> | <b>25 933 (17.7%)</b>  |
| <b>Total participants in main analyses</b>             | <b>52 929 (81.8%)</b> | <b>67 694 (82.7%)</b> | <b>120 623 (82.3%)</b> |

\*Prior history at baseline of myocardial infarction, angina, stroke, chronic obstructive pulmonary disease, cirrhosis of the liver, chronic kidney disease, any cancer (including skin), or peptic ulcer.

**Table S3. Frequency of alcohol consumption in regular drinkers included in the main analyses, by sex and type of alcohol consumed**

|                                        | Days per week of alcohol consumption |            |            |          |          |          |            | All         |
|----------------------------------------|--------------------------------------|------------|------------|----------|----------|----------|------------|-------------|
|                                        | 1                                    | 2          | 3          | 4        | 5        | 6        | 7          |             |
| <b>Men</b>                             |                                      |            |            |          |          |          |            |             |
| Rum only drinkers                      | 2520 (30%)                           | 2193 (26%) | 1366 (16%) | 557 (7%) | 428 (5%) | 170 (2%) | 1282 (15%) | 8516 (100%) |
| Beer only drinkers                     | 486 (56%)                            | 219 (25%)  | 76 (9%)    | 21 (2%)  | 16 (2%)  | 8 (1%)   | 38 (4%)    | 864 (100%)  |
| Drinkers of both rum and beer          |                                      |            |            |          |          |          |            |             |
| Rum                                    | 2494 (41%)                           | 1643 (27%) | 800 (13%)  | 317 (5%) | 239 (4%) | 93 (2%)  | 455 (8%)   | 6041 (100%) |
| Beer                                   | 3313 (55%)                           | 1556 (26%) | 556 (9%)   | 185 (3%) | 152 (3%) | 45 (1%)  | 234 (4%)   | 6041 (100%) |
| All (highest frequency of rum or beer) | 2185 (36%)                           | 1695 (28%) | 906 (15%)  | 365 (6%) | 283 (5%) | 109 (2%) | 498 (8%)   | 6041 (100%) |
| <b>Women</b>                           |                                      |            |            |          |          |          |            |             |
| Rum only drinkers                      | 547 (49%)                            | 245 (22%)  | 139 (12%)  | 48 (4%)  | 33 (3%)  | 17 (2%)  | 87 (8%)    | 1116 (100%) |
| Beer only drinkers                     | 385 (73%)                            | 85 (16%)   | 30 (6%)    | 4 (1%)   | 4 (1%)   | 4 (1%)   | 16 (3%)    | 528 (100%)  |
| Drinkers of both rum and beer          |                                      |            |            |          |          |          |            |             |
| Rum                                    | 851 (61%)                            | 291 (21%)  | 119 (8%)   | 44 (3%)  | 21 (1%)  | 16 (1%)  | 59 (4%)    | 1401 (100%) |
| Beer                                   | 951 (68%)                            | 273 (19%)  | 79 (6%)    | 37 (3%)  | 12 (1%)  | 10 (1%)  | 39 (3%)    | 1401 (100%) |
| All (highest frequency of rum or beer) | 792 (57%)                            | 301 (21%)  | 140 (10%)  | 65 (5%)  | 20 (1%)  | 18 (1%)  | 65 (5%)    | 1401 (100%) |

Exclusions and conventions are as per table 1.

**Table S4. Alcohol consumption at baseline and resurvey (mean 8.6 years after recruitment), among 20 593 participants\***

|                                                                | Non-drinkers | Occasional drinkers | Regular drinkers (35cl bottles of rum per week) |           |           |
|----------------------------------------------------------------|--------------|---------------------|-------------------------------------------------|-----------|-----------|
|                                                                |              |                     | <1                                              | 1-<3      | ≥3        |
| <b>Participants, at baseline</b>                               | 18 298       | 148                 | 451                                             | 804       | 892       |
| <b>Alcohol consumption at resurvey, N (%)</b>                  |              |                     |                                                 |           |           |
| Non-drinkers                                                   | 17 936 (98)  | 69 (47)             | 138 (31)                                        | 216 (27)  | 212 (24)  |
| Occasional drinkers                                            | 2 (0.01)     | 3 (2)               | 1 (0.2)                                         | 0 (0)     | 0 (0)     |
| Regular drinkers, 35cl bottles of rum per week                 |              |                     |                                                 |           |           |
| <1                                                             | 118 (0.6)    | 46 (31)             | 302 (67)                                        | 30 (4)    | 37 (4)    |
| 1-<3                                                           | 141 (0.8)    | 14 (9)              | 6 (1)                                           | 537 (67)  | 75 (8)    |
| ≥3                                                             | 101 (0.6)    | 16 (11)             | 4 (0.9)                                         | 21 (3)    | 568 (64)  |
| <b>Mean alcohol consumption (35cl bottles/week), mean (SD)</b> |              |                     |                                                 |           |           |
| At baseline, all participants                                  | 0 (0)        | 0 (0)               | 0.6 (0.3)                                       | 1.9 (0.5) | 6.4 (3.3) |
| At resurvey, all participants                                  | 0.05 (0.5)   | 0.9 (1.7)           | 0.5 (0.8)                                       | 1.5 (1.8) | 4.2 (4.2) |
| At baseline, regular drinkers at both baseline and resurvey    | -            | -                   | 0.6 (0.3)                                       | 1.9 (0.5) | 6.5 (3.4) |
| At resurvey, regular drinkers at both baseline and resurvey    | -            | -                   | 0.7 (0.8)                                       | 2.1 (1.7) | 5.5 (4.0) |

\*Exclusions and conventions are as per table 1, with further exclusion of participants with missing or incomplete information on alcohol consumption at resurvey

**Table S5. Alcohol consumption versus all-cause mortality at ages 35-79 years in Cuba, among regular (ie, at least weekly) drinkers, with progressive adjustment for potential confounders**

|                         | Deaths | RR per 35cl bottle of rum per week, adjusting for age, sex, and province |               | RR per 35cl bottle of rum per week, adjusting for age, sex, province and education |               | RR per 35cl bottle of rum per week, adjusting for age, sex, province, education and smoking |               |
|-------------------------|--------|--------------------------------------------------------------------------|---------------|------------------------------------------------------------------------------------|---------------|---------------------------------------------------------------------------------------------|---------------|
|                         |        | RR (95%CI)                                                               | Wald $\chi^2$ | RR (95%CI)                                                                         | Wald $\chi^2$ | RR (95%CI)                                                                                  | Wald $\chi^2$ |
| <b>Vascular</b>         | 801    | 1.07 (1.03-1.12)                                                         | 9.7           | 1.06 (1.02-1.11)                                                                   | 7.3           | 1.05 (1.00-1.10)                                                                            | 4.1           |
| Ischaemic heart disease | 386    | 1.07 (1.00-1.14)                                                         | 3.9           | 1.06 (0.99-1.13)                                                                   | 3.0           | 1.04 (0.97-1.11)                                                                            | 1.4           |
| Stroke                  | 192    | 1.05 (0.96-1.16)                                                         | 1.3           | 1.04 (0.95-1.15)                                                                   | 0.8           | 1.03 (0.94-1.14)                                                                            | 0.5           |
| Other                   | 223    | 1.11 (1.02-1.21)                                                         | 5.5           | 1.10 (1.01-1.19)                                                                   | 4.4           | 1.08 (0.99-1.17)                                                                            | 2.9           |
| <b>Cancer</b>           | 773    | 1.11 (1.06-1.16)                                                         | 20.4          | 1.10 (1.06-1.16)                                                                   | 18.2          | 1.07 (1.03-1.12)                                                                            | 9.1           |
| Lung                    | 229    | 1.08 (0.99-1.17)                                                         | 3.3           | 1.07 (0.98-1.16)                                                                   | 2.3           | 1.01 (0.93-1.10)                                                                            | 0.1           |
| Upper aero-digestive    | 158    | 1.30 (1.18-1.43)                                                         | 27.0          | 1.28 (1.16-1.41)                                                                   | 24.4          | 1.23 (1.11-1.36)                                                                            | 16.3          |
| Other                   | 386    | 1.05 (0.98-1.12)                                                         | 1.9           | 1.05 (0.98-1.12)                                                                   | 1.7           | 1.03 (0.96-1.10)                                                                            | 0.8           |
| <b>Other medical</b>    | 505    | 1.16 (1.09-1.22)                                                         | 26.1          | 1.14 (1.08-1.21)                                                                   | 22.3          | 1.13 (1.07-1.19)                                                                            | 17.2          |
| Respiratory             | 187    | 1.15 (1.05-1.26)                                                         | 8.7           | 1.13 (1.03-1.24)                                                                   | 6.9           | 1.10 (1.01-1.21)                                                                            | 4.3           |
| Liver cirrhosis         | 65     | 1.34 (1.14-1.58)                                                         | 12.9          | 1.33 (1.13-1.56)                                                                   | 11.7          | 1.32 (1.12-1.55)                                                                            | 10.9          |
| Other                   | 253    | 1.12 (1.03-1.21)                                                         | 7.4           | 1.11 (1.02-1.20)                                                                   | 6.3           | 1.10 (1.01-1.19)                                                                            | 5.3           |
| <b>External</b>         | 161    | 1.18 (1.07-1.30)                                                         | 10.6          | 1.16 (1.05-1.29)                                                                   | 9.0           | 1.15 (1.04-1.28)                                                                            | 7.8           |
| <b>Ill-defined</b>      | 11     | 0.88 (0.55-1.42)                                                         | 0.3           | 0.87 (0.54-1.40)                                                                   | 0.4           | 0.82 (0.51-1.33)                                                                            | 0.6           |
| <b>All</b>              | 2251   | 1.11 (1.08-1.14)                                                         | 61.3          | 1.10 (1.07-1.13)                                                                   | 51.4          | 1.08 (1.05-1.11)                                                                            | 32.3          |

One 35cl bottle of rum is equivalent to 110g of pure alcohol. Exclusions and conventions are as per table 1.



# Figure S1. Alcohol consumption versus all-cause mortality at ages 35-79 years in Cuba, during follow-up years <5, 5-<10, 10-<15, and 15 onwards

Rate ratio (RR) adjusted for age, sex, education, province, and smoking. Exclusions and conventions as in table 1.

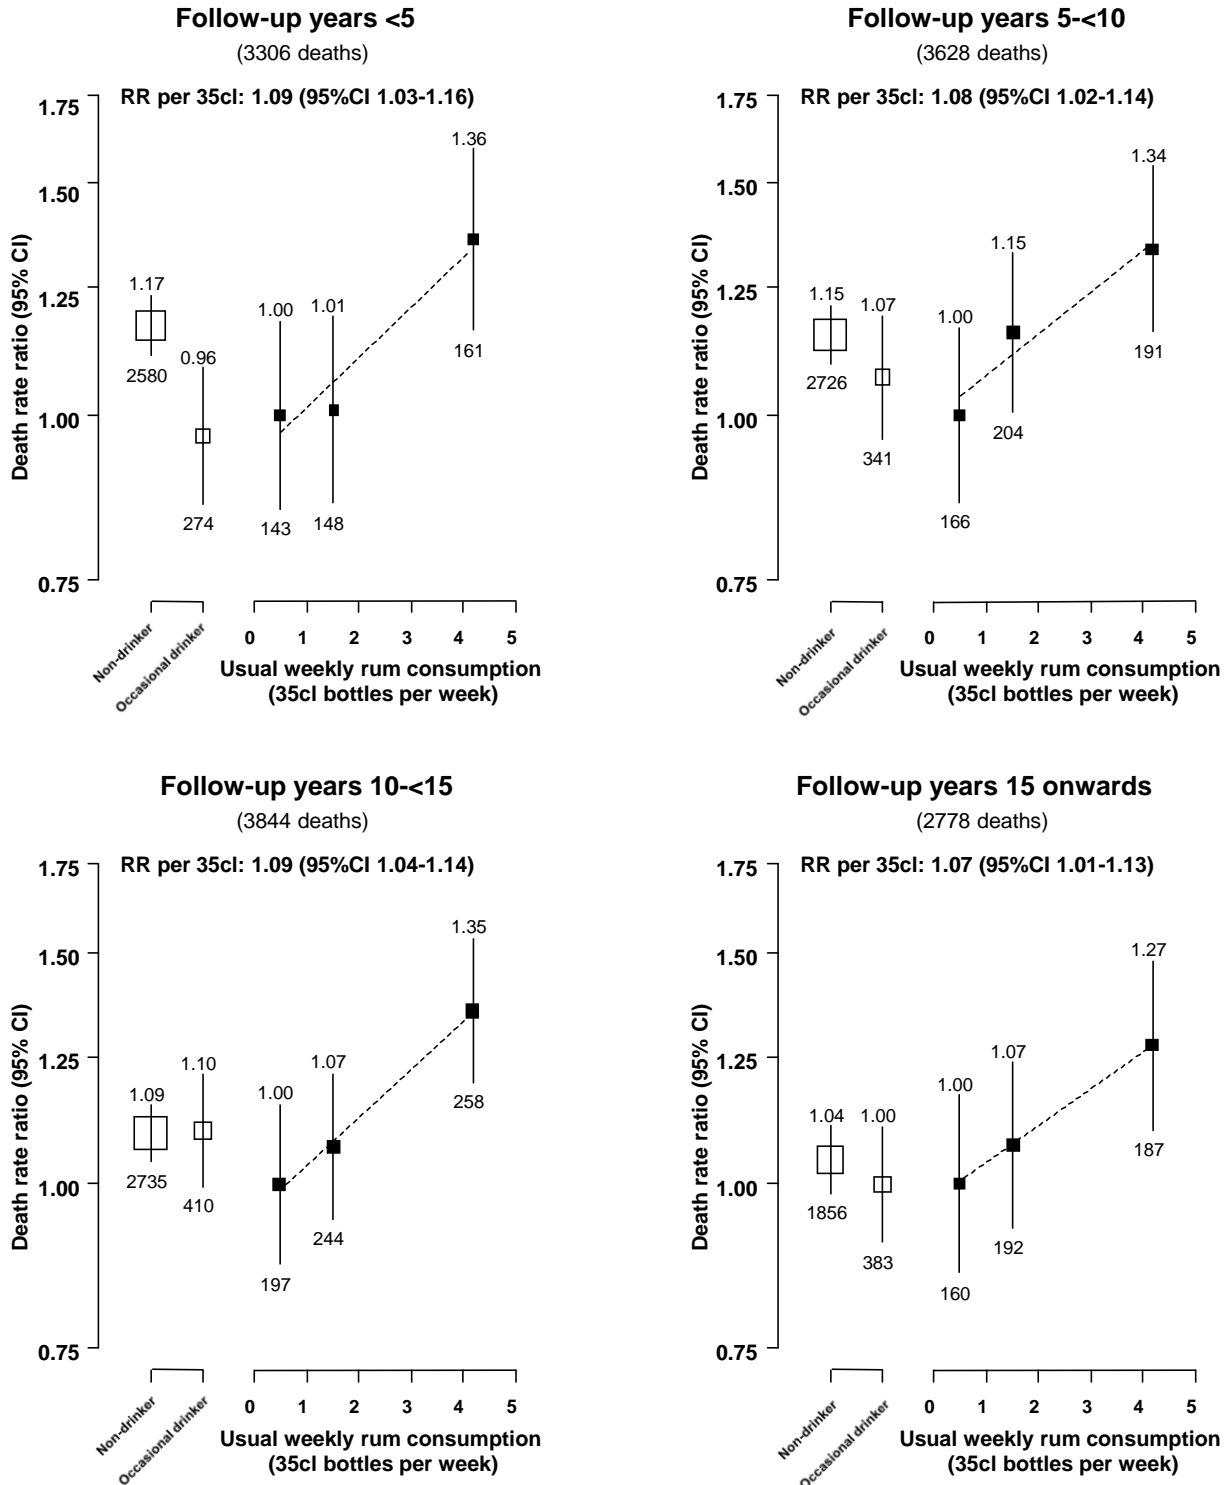

## Figure S2. Alcohol consumption versus all-cause mortality in Cuba, by age, by sex and by smoking

Rate ratios (RR) adjusted for age, sex, education, province, and smoking. Exclusions and conventions as per table 1.

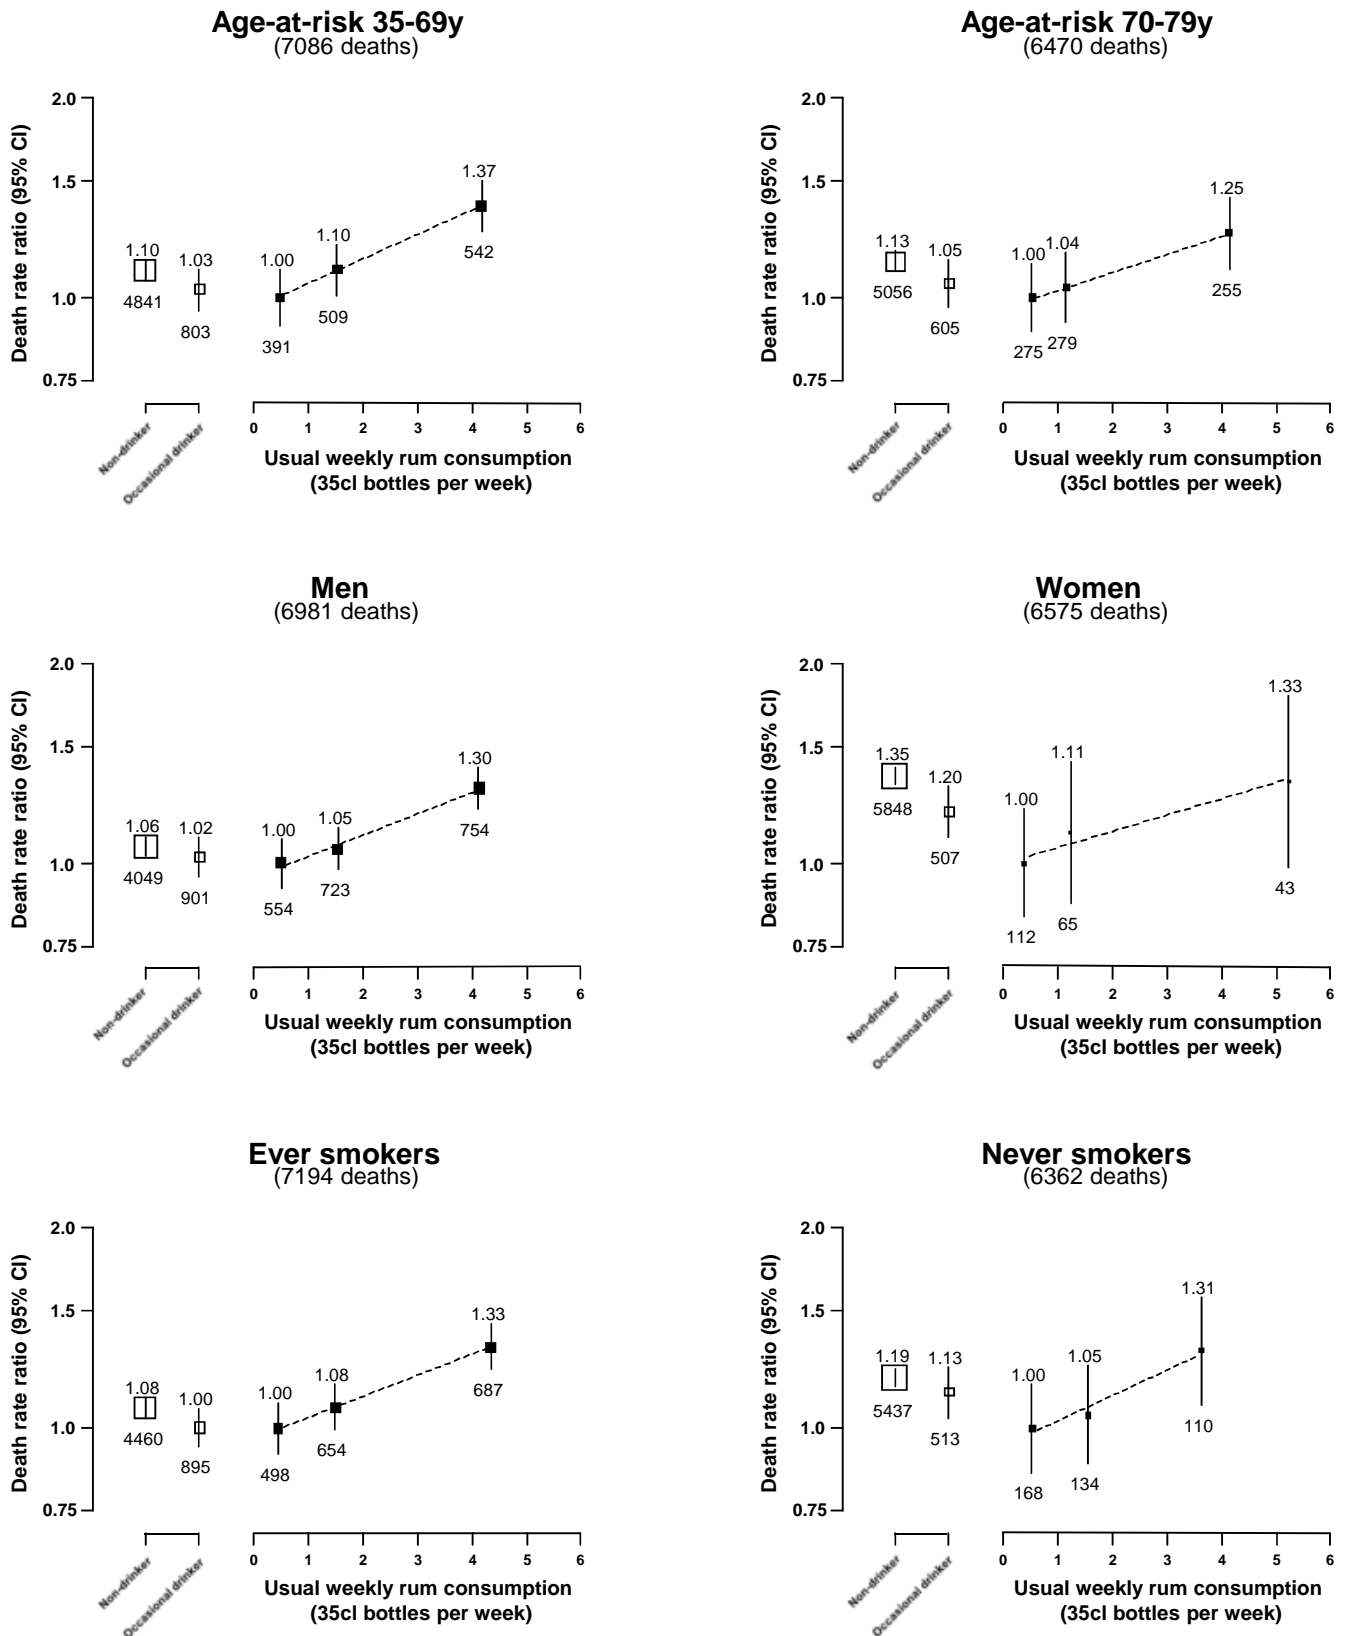

**Table S6. Observed and expected numbers of deaths from specific causes at ages 35-79 years in Cuba, by weekly alcohol consumption**

|                         | At least weekly alcohol drinker (35cl bottles of rum per week) |                 |                 |                 |                   |                 |               |
|-------------------------|----------------------------------------------------------------|-----------------|-----------------|-----------------|-------------------|-----------------|---------------|
|                         | 1-<3 bottles                                                   |                 | ≥3 bottles      |                 | Total (≥1 bottle) |                 |               |
|                         | Observed deaths                                                | Expected deaths | Observed deaths | Expected deaths | Observed deaths   | Expected deaths | Excess Deaths |
| <b>Vascular</b>         | 284                                                            | 272.2           | 261             | 218.3           | 545               | 490.5           | 54.5 (21%)    |
| Ischaemic heart disease | 138                                                            | 132.7           | 125             | 107.8           | 263               | 240.5           | 22.5 (9%)     |
| Stroke                  | 67                                                             | 66.3            | 59              | 52.2            | 126               | 118.5           | 7.5 (3%)      |
| Other                   | 79                                                             | 73.1            | 77              | 58.3            | 156               | 131.5           | 24.5 (10%)    |
| <b>Cancer*</b>          | 190                                                            | 174.4           | 197             | 143.5           | 387               | 317.9           | 69.1 (27%)    |
| Upper aero-digestive    | 44                                                             | 46.3            | 79              | 40.9            | 123               | 87.2            | 35.8 (14%)    |
| Other                   | 146                                                            | 128.1           | 118             | 102.6           | 264               | 230.7           | 33.3 (13%)    |
| <b>Other Medical</b>    | 173                                                            | 151.0           | 192             | 122.5           | 365               | 273.4           | 91.6 (36%)    |
| Respiratory             | 61                                                             | 62.2            | 71              | 51.4            | 132               | 113.7           | 18.3 (7%)     |
| Liver cirrhosis         | 23                                                             | 11.3            | 32              | 9.2             | 55                | 20.5            | 34.5 (14%)    |
| Other                   | 89                                                             | 77.4            | 89              | 61.8            | 178               | 139.2           | 38.8 (15%)    |
| <b>External</b>         | 56                                                             | 45.2            | 66              | 37.9            | 122               | 83.1            | 38.9 (15%)    |
| <b>Ill-defined</b>      | 6                                                              | 3.9             | 2               | 3.5             | 8                 | 7.4             | 0.6 (0%)      |
| <b>All</b>              | 709                                                            | 646.6           | 718             | 525.7           | 1427              | 1172.3          | 254.7 (100%)  |

Expected deaths are calculated by applying the rates at ages 35-79 years (table 3) among those who reported drinking <1 bottle rum per week. Excess deaths are calculated as observed minus expected deaths. Death from vascular, cancer and other medical are sum of subcategories. Exclusions and conventions are as per table 1. \*Excludes lung cancer for which there was no evidence of an association among at least weekly drinkers.

**Figure S3. Alcohol consumption versus all-cause, vascular, cancer and other mortality at ages 35-79 years in Cuba, with additional adjustment for other potential confounders**

Rate ratios (RR) adjusted for age, sex, education, province, smoking, occupation, marital status, diabetes, and BMI. Exclusions and conventions as per table 1.

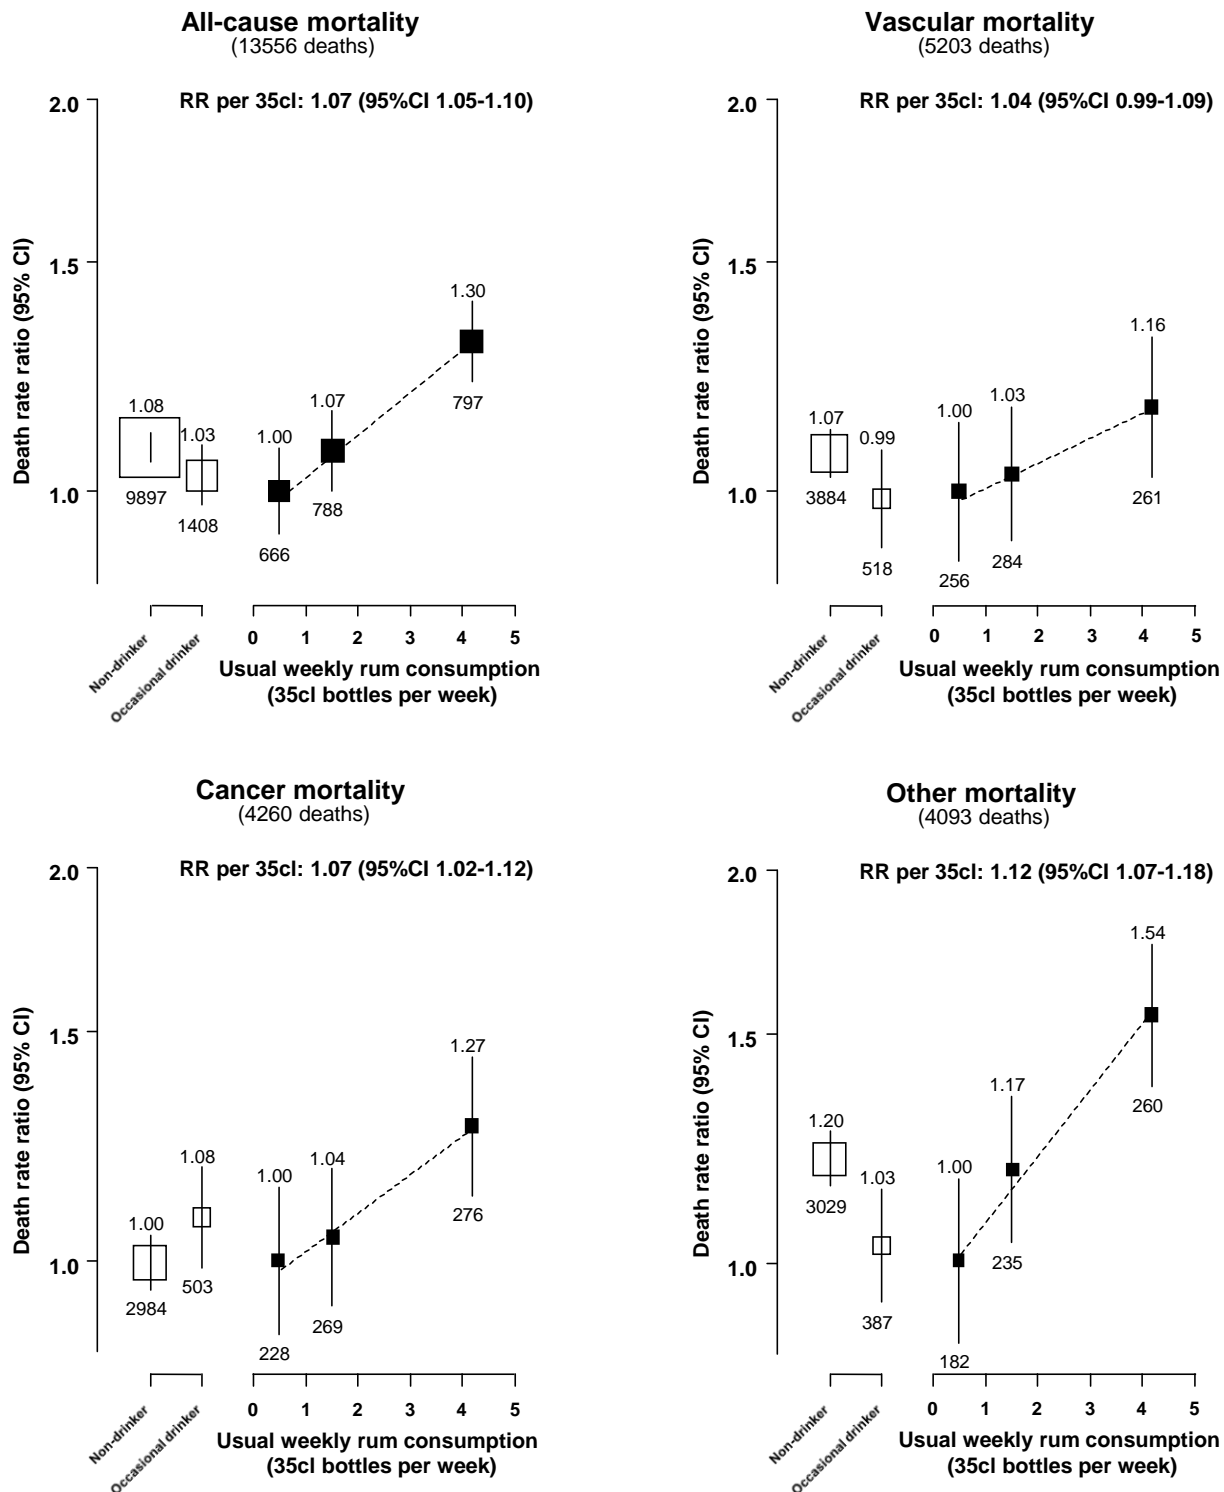

## Figure S4. Alcohol consumption versus all-cause, vascular, cancer and other mortality at ages 35-79 years in Cuba, excluding first two years of follow-up

Rate ratios (RR) adjusted for age, sex, education, province, and smoking. Exclusions and conventions as per table 1, with further exclusion of the first 2 years of follow-up.

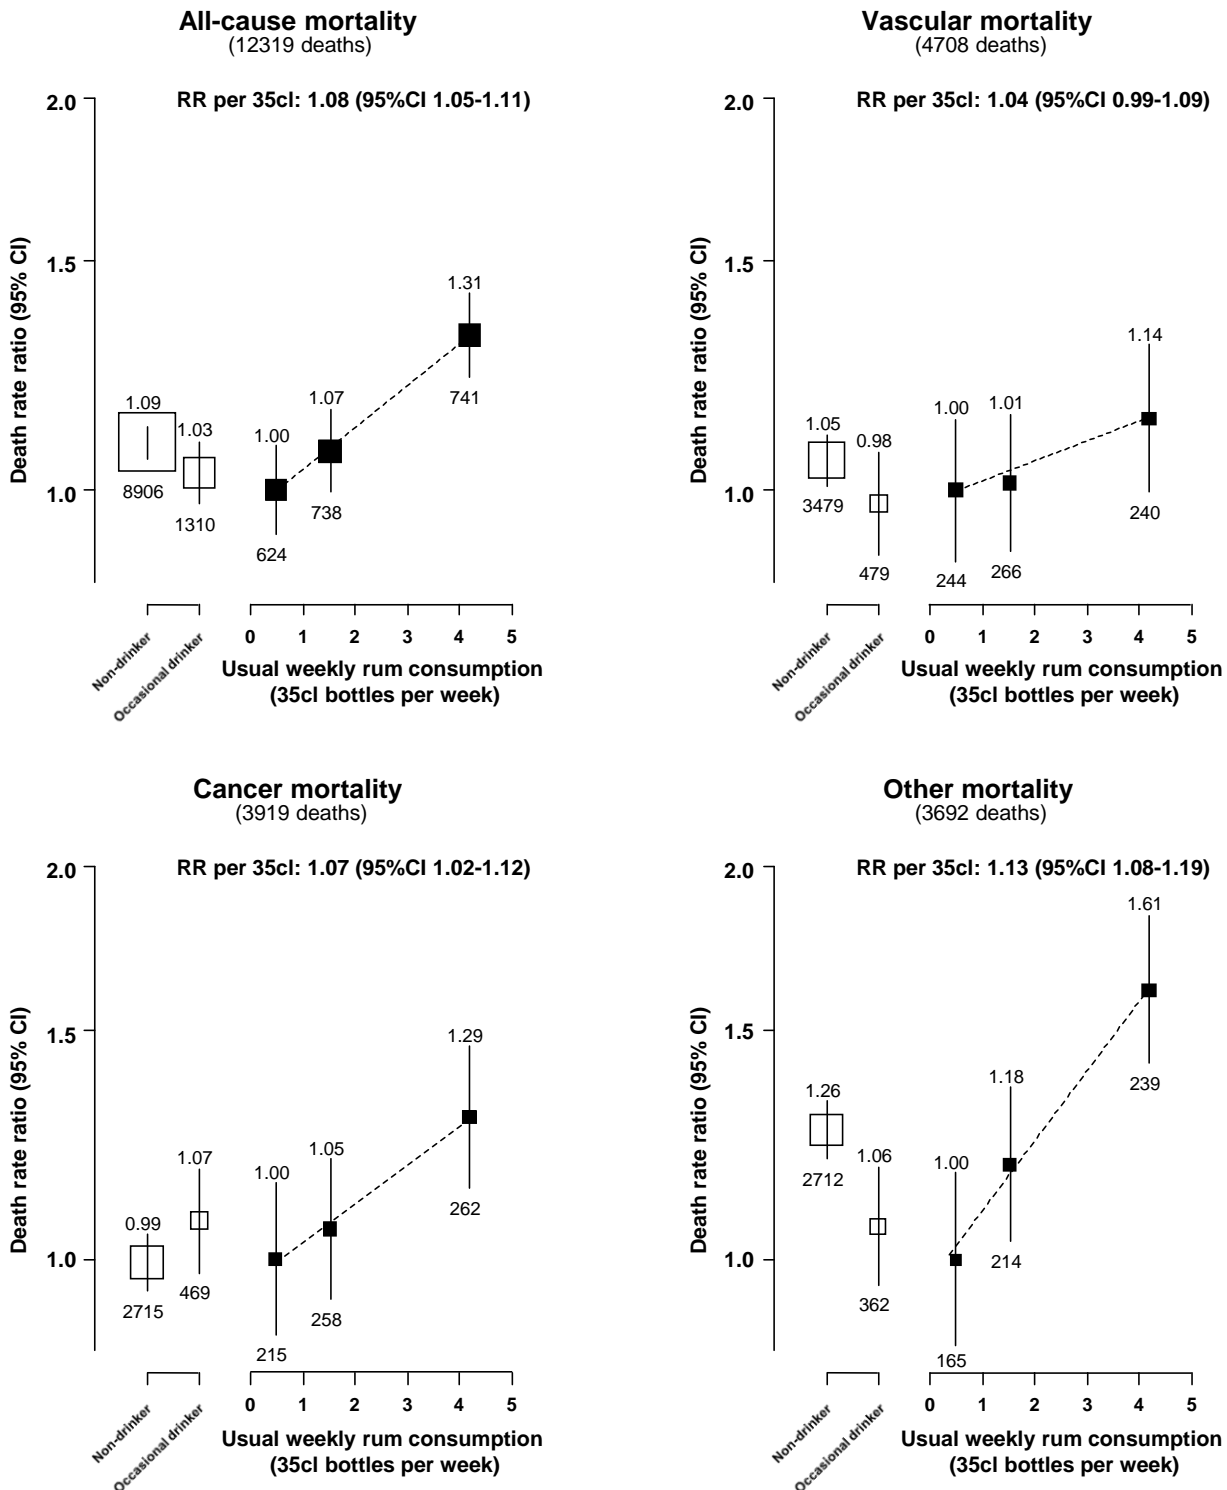

# Figure S5. Alcohol consumption versus all-cause, vascular, cancer and other mortality at ages 35-79 years in Cuba, excluding participants taking anti-hypertensives

Rate ratios (RR) adjusted for age, sex, education, province, and smoking. Exclusions and conventions as per table 1, with further exclusion of those taking antihypertensive medication.

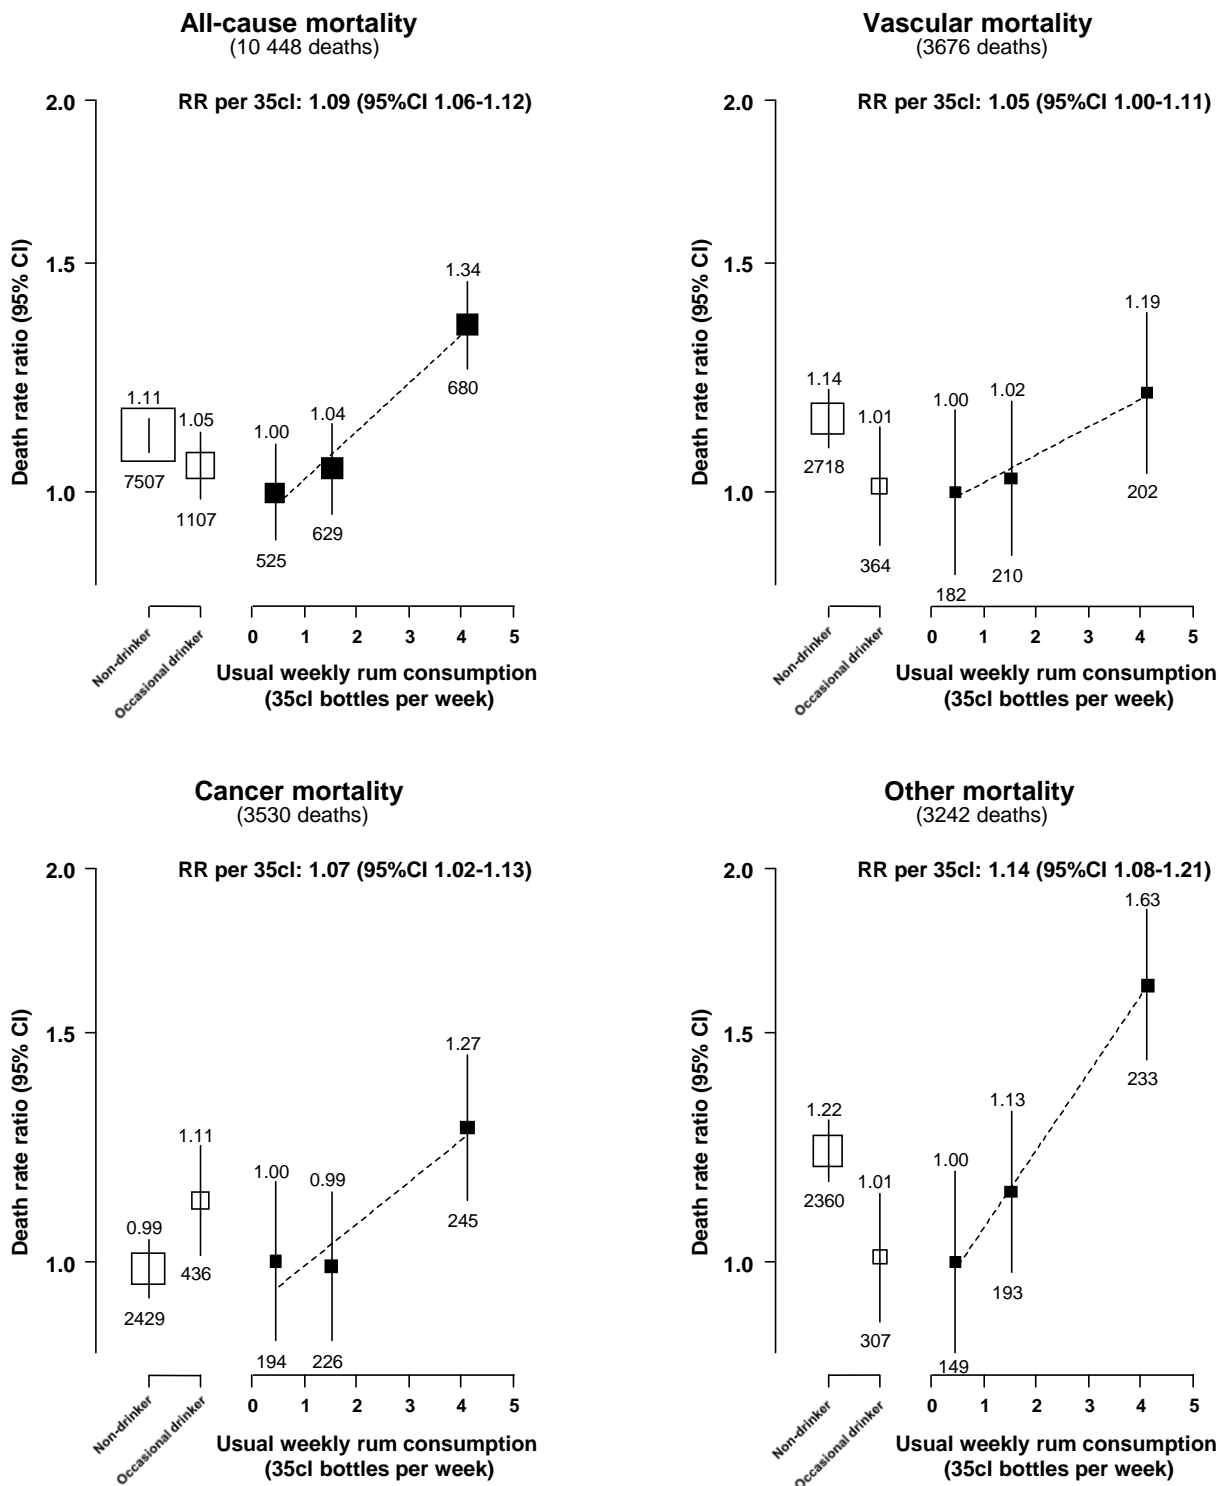

Supplement: mmc1.pdf [file mmc1.pdf]
